# Supplementary material for: Effectiveness of the SARS-CoV-2 mRNA Vaccines in Pregnant Women
Source: Research Square preprint supplement (doi:10.21203/rs.3.rs-622782/v1), 2021-06-22
Supplement: Supplementary file 1 [file b08d362c91508267dfa734fe.docx]

**Investigators and collaborators of the national study group for COVID-19 vaccination**

Hamad Medical Corporation, Doha, Qatar

Adeel A. Butt, M.D. M.S.

Abdullatif Al Khal, M.D.

Anvar H. Kaleeckal, M.Sc.

Ali Nizar Latif, M.D.

Peter Coyle, M.D.

Andrew Jeremijenko, MD

Zeina Al Kanaani, Ph.D.

Einas Al Kuwari, M.D.

Riyazuddin M. Shaik, M.Sc.

Ministry of Public Health, Doha, Qatar

Roberto Bertollini, M.D., M.P.H.

Hamad Eid Al Romaihi, M.D.

Mohamed H. Al Thani, M.D., M.P.H.

Weill Cornell Medicine-Qatar, Cornell University, Doha, Qatar

Laith J. Abu Raddad, Ph.D.

Hiam Chemaitelly, M.Sc.

Qatar University, Doha, Qatar

Hanan F. Abdul Rahim, Ph.D.

Houssein H. Ayoub, Ph.D.

Gheyath K. Nasrallah, Ph.D.

Hadi M. Yassine, Ph.D.

Fatiha M. Benslimane, PhD

Hebah A. Al Khatib, PhD

Sidra Medicine, Doha, Qatar

Patrick Tang, M.D. Ph.D.

Primary Health Care Corporation, Doha, Qatar

Mohamed Ghaith Al Kuwari, M.D.,

Details of PCR testing methods for SARS-CoV-2

Nasopharyngeal and/or oropharyngeal swabs (Huachenyang Technology, China) were collected for PCR testing and placed in Universal Transport Medium (UTM). Aliquots of UTM were: extracted on a QIAsymphony platform (QIAGEN, USA) and tested with real-time reverse-transcription PCR (RT-qPCR) using TaqPath™ COVID-19 Combo Kits (100% sensitivity and specificity3; Thermo Fisher Scientific, USA) on an ABI 7500 FAST (ThermoFisher, USA); extracted using a custom protocol14 on a Hamilton Microlab STAR (Hamilton, USA) and tested using AccuPower SARS-CoV-2 Real-Time RT-PCR Kits (100% sensitivity and specificity15; Bioneer, Korea) on an ABI 7500 FAST; or loaded directly into a Roche cobas® 6800 system and assayed with a cobas® SARS-CoV-2 Test (95% sensitivity, 100% specificity16; Roche, Switzerland). The first assay targets the viral S, N, and ORF1ab regions. The second targets the viral RdRp and E-gene regions, and the third targets the ORF1ab and E-gene regions.

All tests were conducted at the HMC Central Laboratory or Sidra Medicine Laboratory, following standardized protocols.

STROBE checklist of items that should be included in reporting a case-control study

|  | Item No | Recommendation | Main text page | |
| --- | --- | --- | --- | --- |
| **Title and abstract** | 1 | (*a*) Indicate the study’s design with a commonly used term in the title or the abstract | 4 | |
| (*b*) Provide in the abstract an informative and balanced summary of what was done and what was found | 4,5 | |
| Introduction | | | |  | |
| Background/rationale | 2 | Explain the scientific background and rationale for the investigation being reported | 6 | |
| Objectives | 3 | State specific objectives, including any prespecified hypotheses | 6 | |
| Methods | | | |  | |
| Study design | 4 | Present key elements of study design | 6,7,8 | |
| Setting | 5 | Describe the setting, locations, and relevant dates, including periods of recruitment, exposure, follow-up, and data collection | 6,7,8 | |
| Participants | 6 | (*a*) Give the eligibility criteria, and the sources and methods of case ascertainment and control selection. Give the rationale for the choice of cases and controls | 7 | |
| (*b*)For matched studies, give matching criteria and the number of controls per case | 7 | |
| Variables | 7 | Clearly define all outcomes, exposures, predictors, potential confounders, and effect modifiers. Give diagnostic criteria, if applicable | 8 | |
| Data sources/ measurement | 8* | For each variable of interest, give sources of data and details of methods of assessment (measurement). Describe comparability of assessment methods if there is more than one group | 6,7,8 | |
| Bias | 9 | Describe any efforts to address potential sources of bias | N/A | |
| Study size | 10 | Explain how the study size was arrived at | Figure; 11 | |
| Quantitative variables | 11 | Explain how quantitative variables were handled in the analyses. If applicable, describe which groupings were chosen and why | 6-8 | |
| Statistical methods | 12 | (*a*) Describe all statistical methods, including those used to control for confounding | 6-8 | |
| (*b*) Describe any methods used to examine subgroups and interactions | 6-8 | |
| (*c*) Explain how missing data were addressed | 6-8 | |
| (*d*) If applicable, explain how matching of cases and controls was addressed | 6-8 | |
| (*e*) Describe any sensitivity analyses | 6-8 | |
| Results | | | |  | |
| Participants | 13* | (a) Report numbers of individuals at each stage of study—eg numbers potentially eligible, examined for eligibility, confirmed eligible, included in the study, completing follow-up, and analysed | 11; Figure | |
| (b) Give reasons for non-participation at each stage | 11; Figure | |
| (c) Consider use of a flow diagram | 11; Figure | |
| Descriptive data | 14* | (a) Give characteristics of study participants (eg demographic, clinical, social) and information on exposures and potential confounders | 8, 12; Table 1; | |
| (b) Indicate number of participants with missing data for each variable of interest | N/A | |
| Outcome data | 15* | Report numbers in each exposure category, or summary measures of exposure | 8,9 | |
| Main results | 16 | (*a*) Give unadjusted estimates and, if applicable, confounder-adjusted estimates and their precision (eg, 95% confidence interval). Make clear which confounders were adjusted for and why they were included | 8,9,10-13 | |
| (*b*) Report category boundaries when continuous variables were categorized | 8,9,10-13 | |
| (*c*) If relevant, consider translating estimates of relative risk into absolute risk for a meaningful time period | N/A | |
| Other analyses | 17 | Report other analyses done—eg analyses of subgroups and interactions, and sensitivity analyses | N/A | |
| Discussion | | | |  | |
| Key results | 18 | Summarise key results with reference to study objectives | 10 | |
| Limitations | 19 | Discuss limitations of the study, taking into account sources of potential bias or imprecision. Discuss both direction and magnitude of any potential bias | 10 | |
| Interpretation | 20 | Give a cautious overall interpretation of results considering objectives, limitations, multiplicity of analyses, results from similar studies, and other relevant evidence | 10 | |
| Generalisability | 21 | Discuss the generalisability (external validity) of the study results | 10 | |
| Other information | | | |  | |
| Funding | 22 | Give the source of funding and the role of the funders for the present study and, if applicable, for the original study on which the present article is based | 5 | |
